# Supplementary material
Source: PubMed Central journal article supplement (PMC4342968)

Campbell, L.P. *et al.* 2015. Climate change influences on global distributions of dengue and chikungunya virus vectors. *Phil. Trans. R. Soc. B.* **370** doi: 10.1098/rstb.2014.0135

### Supplementary Materials

**Figure S1.** Summary of modeled potential distributional patterns of *Aedes aegypti* under present-day conditions based on analysis of 6 principal components.

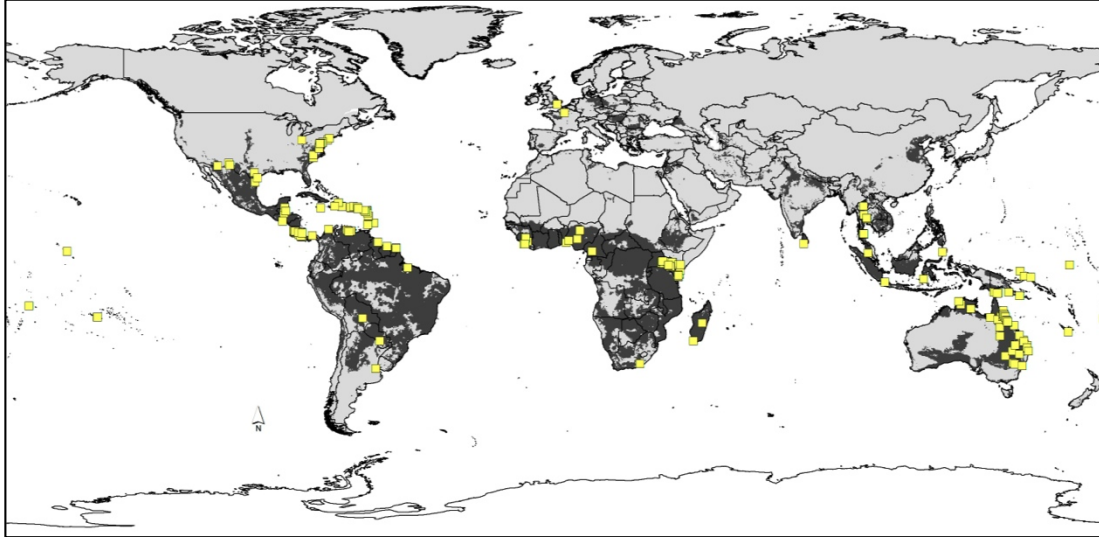

**Figure S2.** Summary of modeled potential distributional patterns of *Aedes albopictus* under present-day conditions based on analysis of 6 principal components.

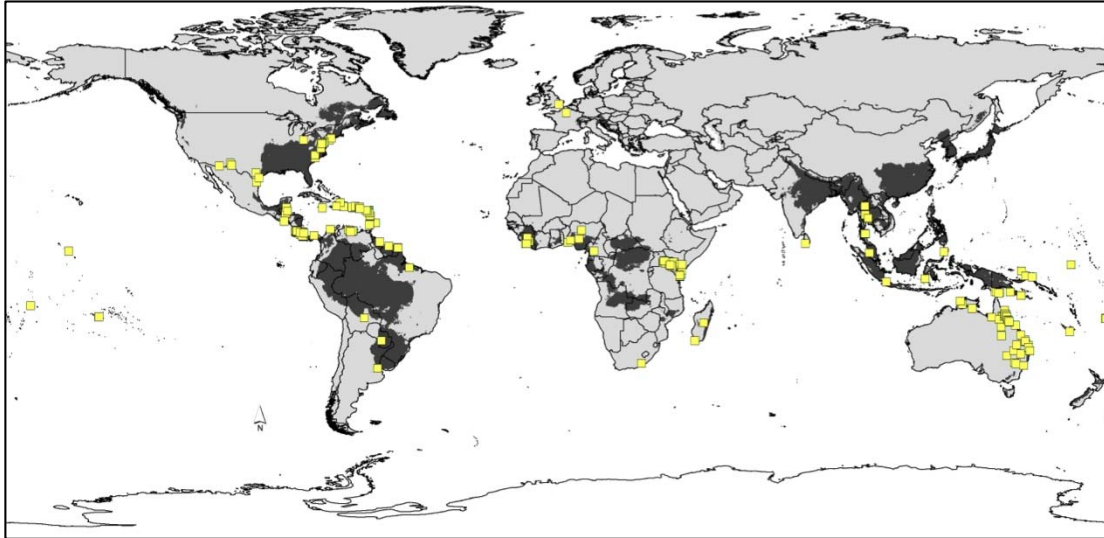

**Figure S3.** Summary of modeled potential distributional patterns of *Aedes aegypti* under future conditions (B1) based on analysis of 8 principal components. Confidence in present-day and future distributional potential is based on agreement among 5 climate models (Table 1): present-day distributional areas are shown in blue, with model agreement shown as shades of blue (light blue = low, dark blue = high model agreement); future distributional potential is shown as shades of orange (light orange = low, dark orange = high model agreement).

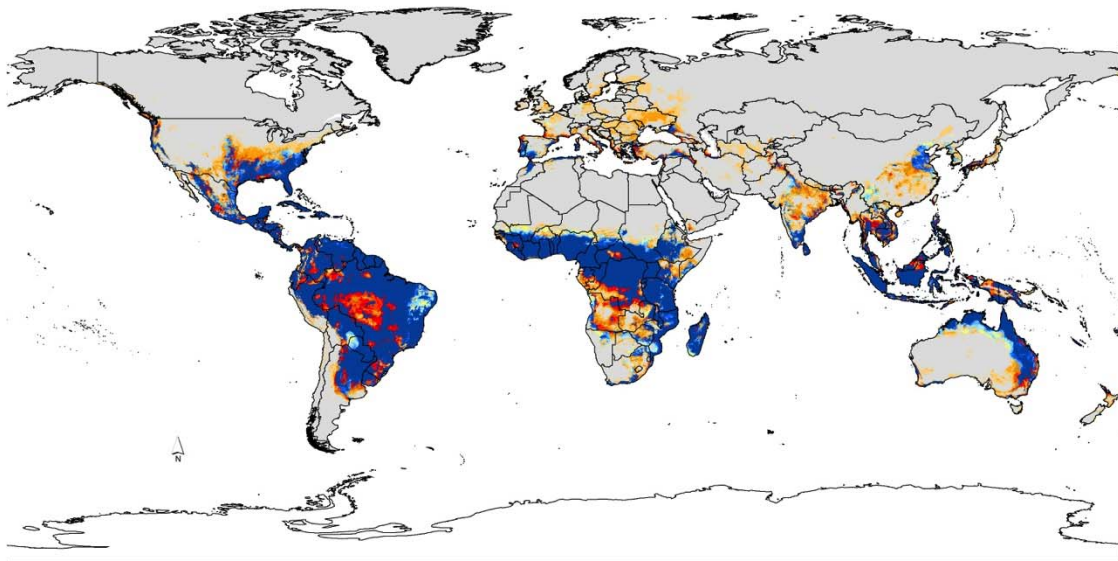

**Figure S4.** Summary of modeled potential distributional patterns of *Aedes albopictus* under future conditions (B1) based on analysis of 8 principal components. Confidence in present-day and future distributional potential is based on agreement among 5 climate models (Table 1): present-day distributional areas are shown in blue, with model agreement shown as shades of blue (light blue = low, dark blue = high model agreement); future distributional potential is shown as shades of orange (light orange = low, dark orange = high model agreement).

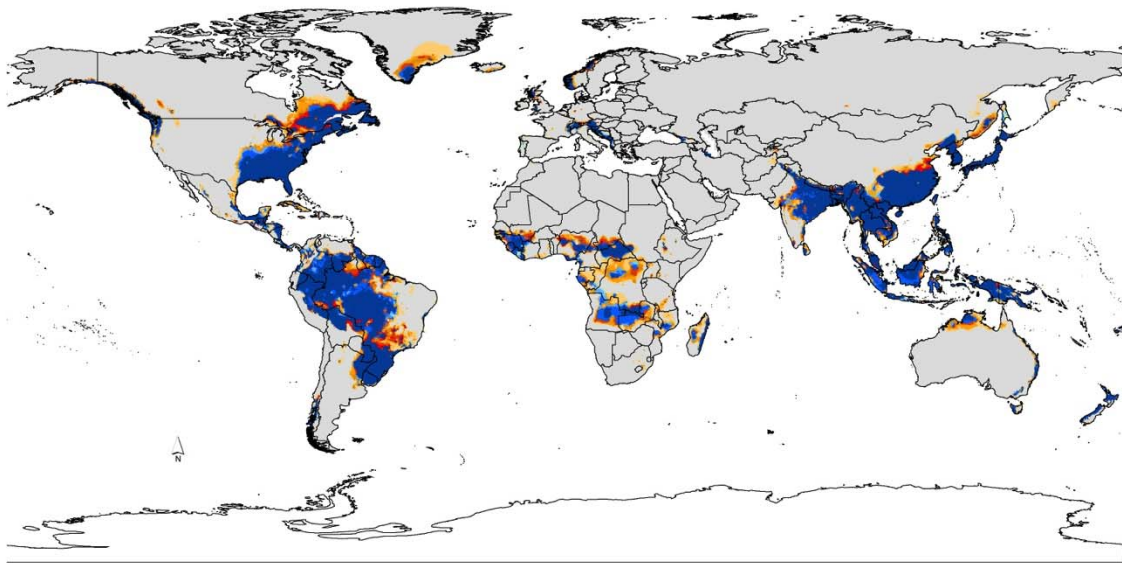

**Figure S5.** Summary of modeled potential distributional patterns of *Aedes aegypti* under future conditions (A2) based on analysis of 8 principal components. Confidence in present-day and future distributional potential is based on agreement among 6 climate models (Table 1): present-day distributional areas are shown in blue, with model agreement shown as shades of blue (light blue = low, dark blue = high model agreement); future distributional potential is shown as shades of orange (light orange = low, dark orange = high model agreement).

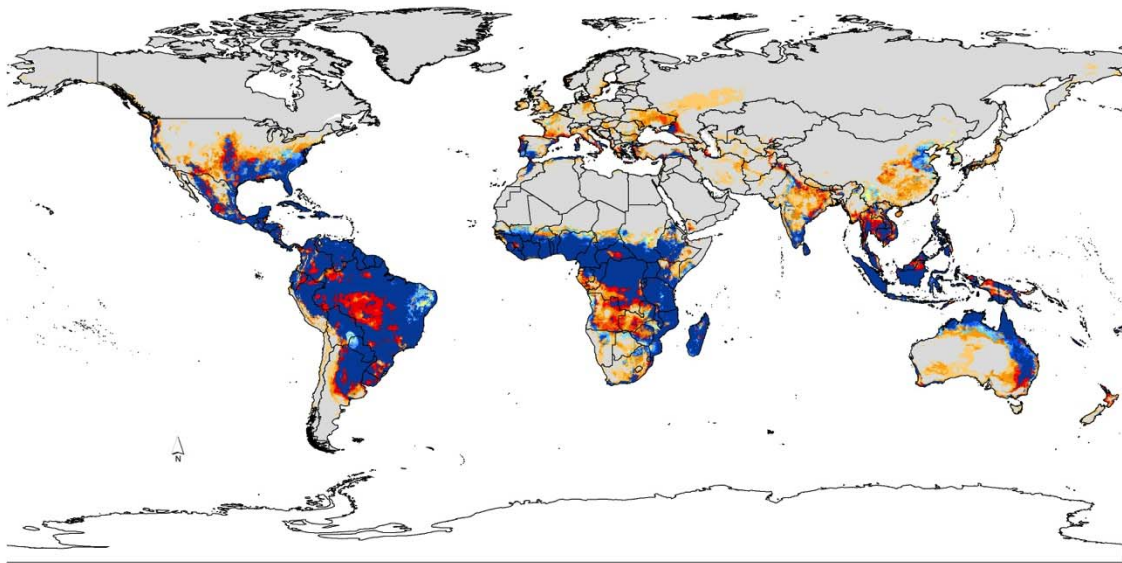

**Figure S6.** Summary of modeled potential distributional patterns of *Aedes albopictus* under future conditions (A2) based on analysis of 8 principal components. Confidence in present-day and future distributional potential is based on agreement among 6 climate models (Table 1): present-day distributional areas are shown in blue, with model agreement shown as shades of blue (light blue = low, dark blue = high model agreement); future distributional potential is shown as shades of orange (light orange = low, dark orange = high model agreement).

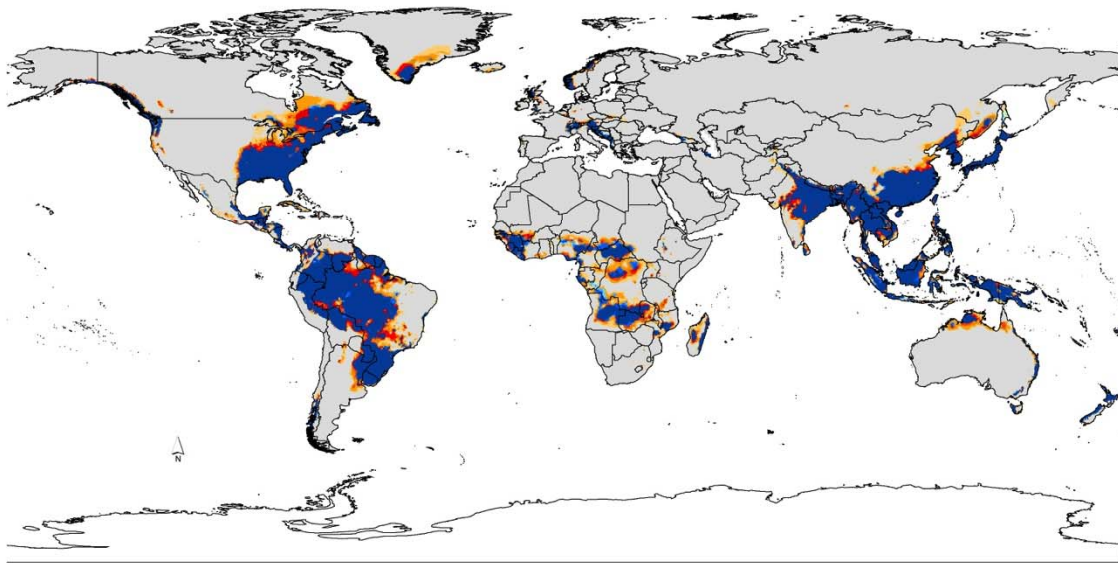

**Figure S7.** Summary of modeled potential distributional patterns of *Aedes aegypti* under future conditions (A1B) based on analysis of 6 principal components. Confidence in present-day and future distributional potential is based on agreement among 6 climate models (Table 1): present-day distributional areas are shown in blue, with model agreement shown as shades of blue (light blue = low, dark blue = high model agreement); future distributional potential is shown as shades of orange (light orange = low, dark orange = high model agreement).

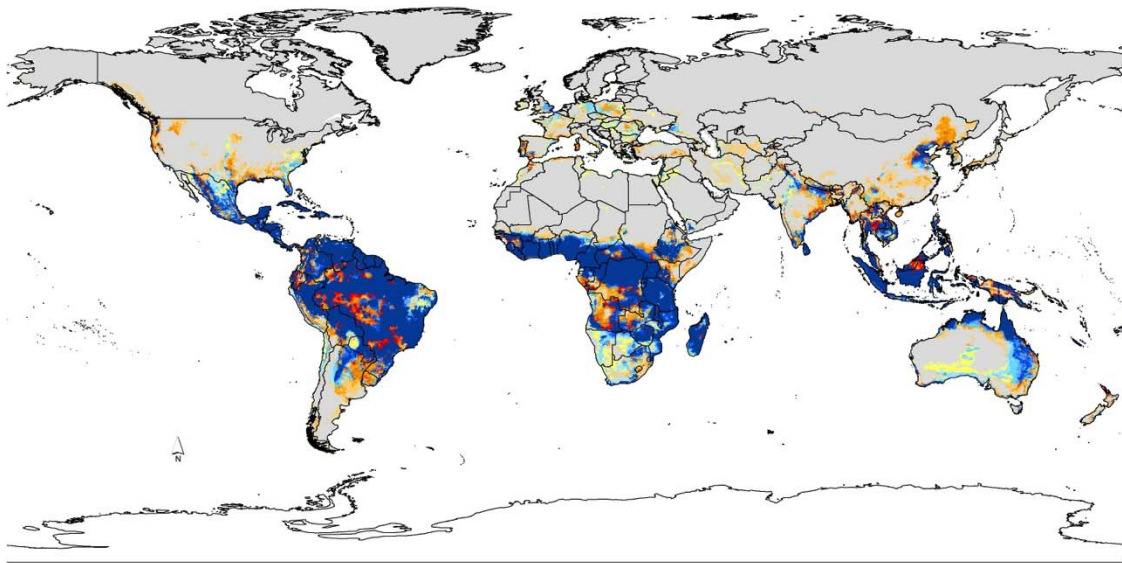

**Figure S8.** Summary of modeled potential distributional patterns of *Aedes albopictus* under future conditions (A1B) based on analysis of 6 principal components. Confidence in present-day and future distributional potential is based on agreement among 6 climate models (Table 1): present-day distributional areas are shown in blue, with model agreement shown as shades of blue (light blue = low, dark blue = high model agreement); future distributional potential is shown as shades of orange (light orange = low, dark orange = high model agreement).

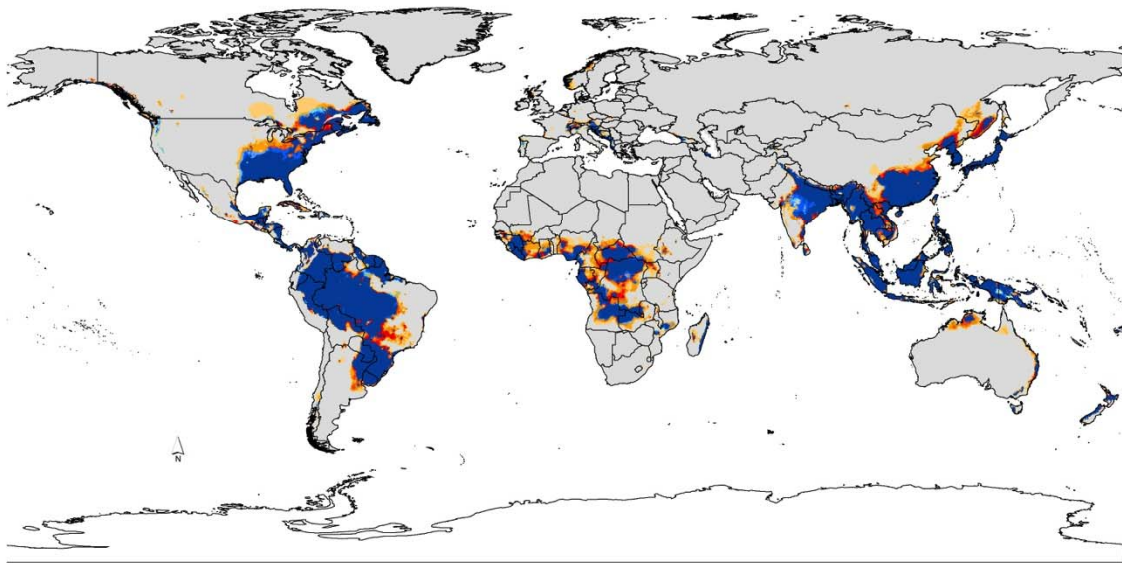



**Figure S9.** Summary of modeled potential distributional patterns of *Aedes aegypti* under future conditions (B1) based on analysis of 6 principal components. Confidence in present-day and future distributional potential is based on agreement among 5 climate models (Table 1): present-day distributional areas are shown in blue, with model agreement shown as shades of blue (light blue = low, dark blue = high model agreement); future distributional potential is shown as shades of orange (light orange = low, dark orange = high model agreement).

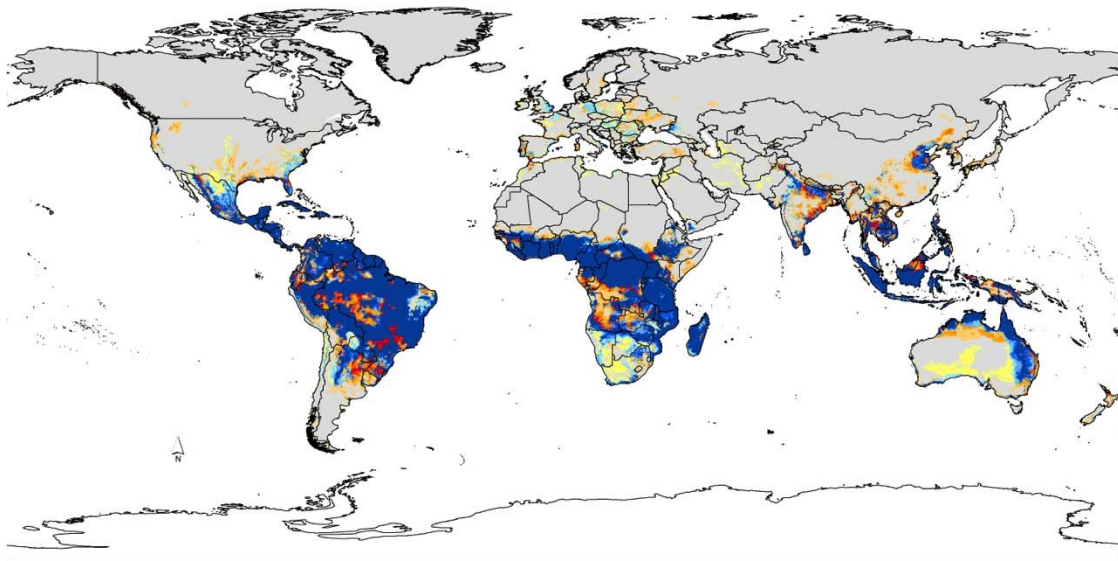

**Figure S10.** Summary of modeled potential distributional patterns of *Aedes albopictus* under future conditions (B1) based on analysis of 6 principal components. Confidence in present-day and future distributional potential is based on agreement among 5 climate models (Table 1): present-day distributional areas are shown in blue, with model agreement shown as shades of blue (light blue = low, dark blue = high model agreement); future distributional potential is shown as shades of orange (light orange = low, dark orange = high model agreement).

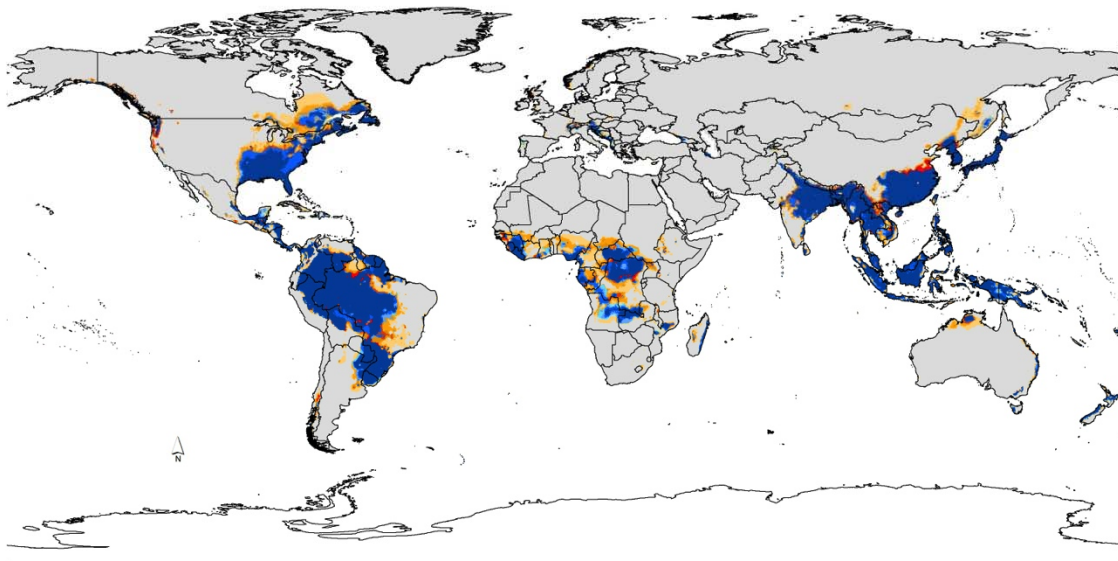

**Figure S11.** Summary of modeled potential distributional patterns of *Aedes aegypti* under future conditions (A2) based on analysis of 6 principal components. Confidence in present-day and future distributional potential is based on agreement among 6 climate models (Table 1): present-day distributional areas are shown in blue, with model agreement shown as shades of blue (light blue = low, dark blue = high model agreement); future distributional potential is shown as shades of orange (light orange = low, dark orange = high model agreement).

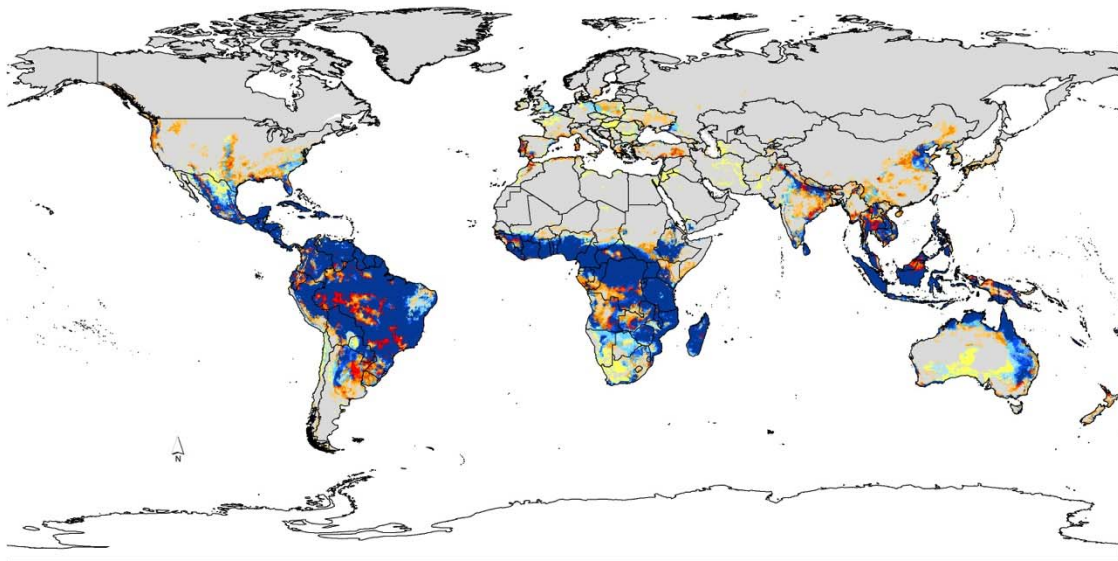

**Figure S12.** Summary of modeled potential distributional patterns of *Aedes albopictus* under future conditions (A2) based on analysis of 6 principal components. Confidence in present-day and future distributional potential is based on agreement among 6 climate models (Table 1): present-day distributional areas are shown in blue, with model agreement shown as shades of blue (light blue = low, dark blue = high model agreement); future distributional potential is shown as shades of orange (light orange = low, dark orange = high model agreement).

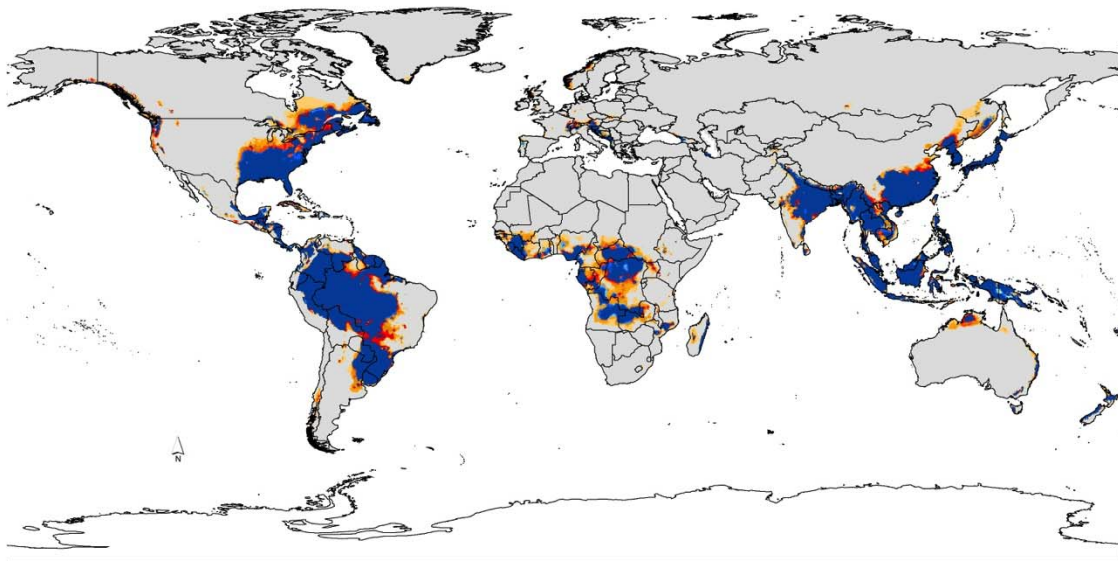

**Figure S13.** Summary of patterns of co-occurrence derived from ecological niche models of *Aedes aegypti* and *A. albopictus* worldwide, both under current conditions and under modeled future conditions (B1 scenario), based on 8 principal components.

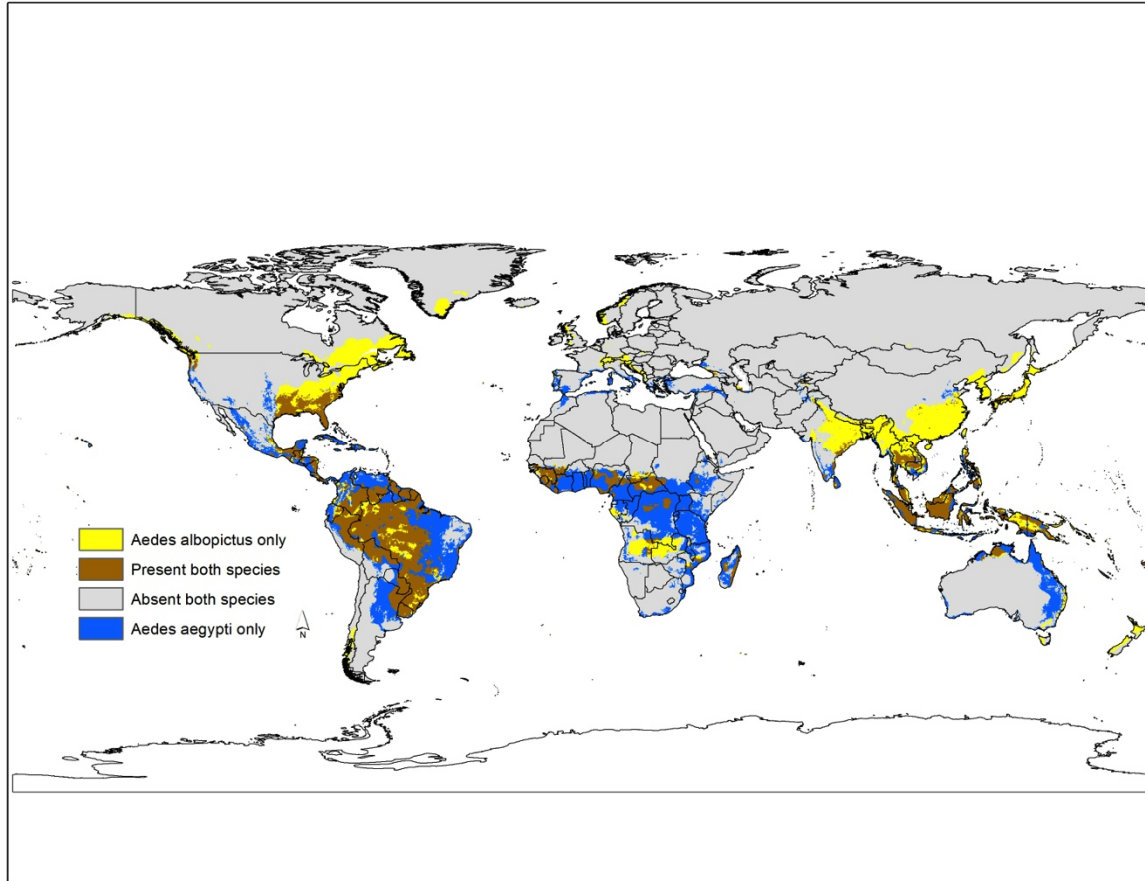

**Figure S14.** Summary of patterns of co-occurrence derived from ecological niche models of *Aedes aegypti* and *A. albopictus* worldwide, both under current conditions and under modeled future conditions (A2 scenario), based on 8 principal components.

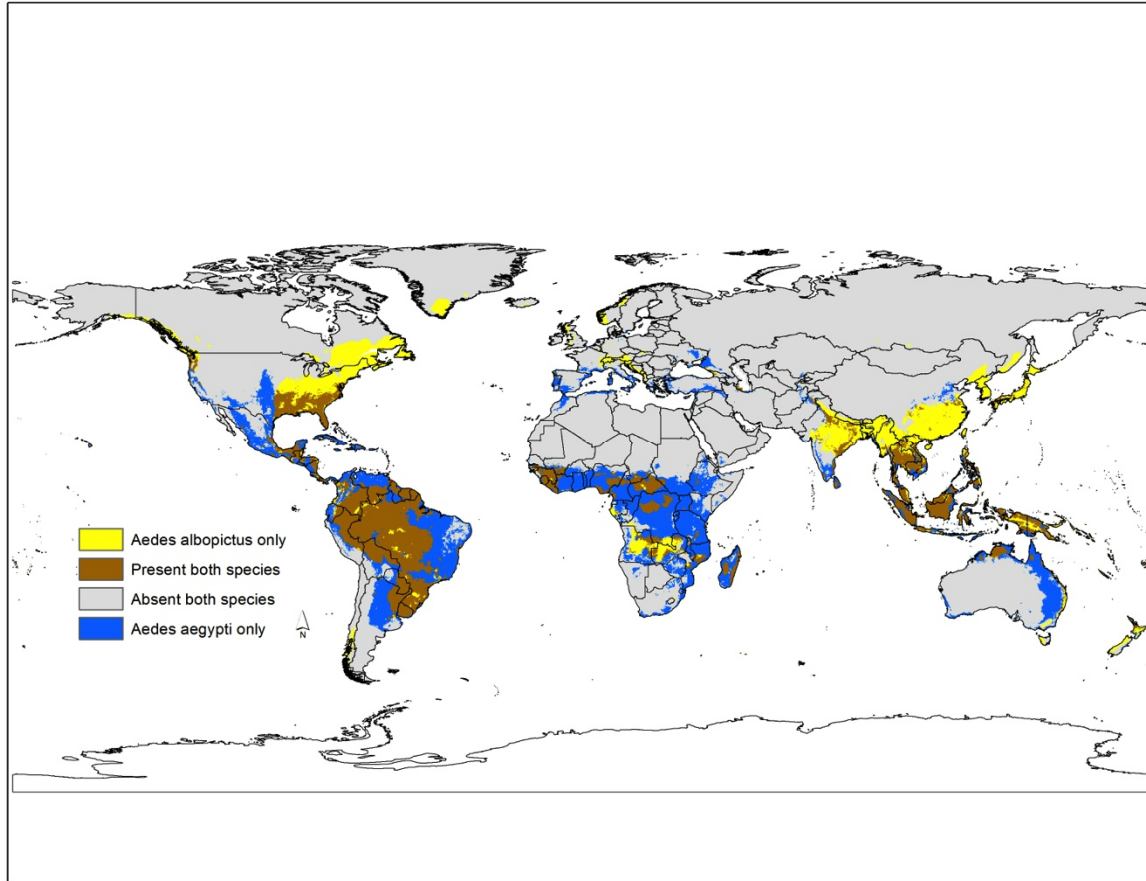

**Figure S15.** Summary of patterns of co-occurrence derived from ecological niche models of *Aedes aegypti* and *A. albopictus* worldwide, both under current conditions and under modeled future conditions (A1B scenario), based on 6 principal components.

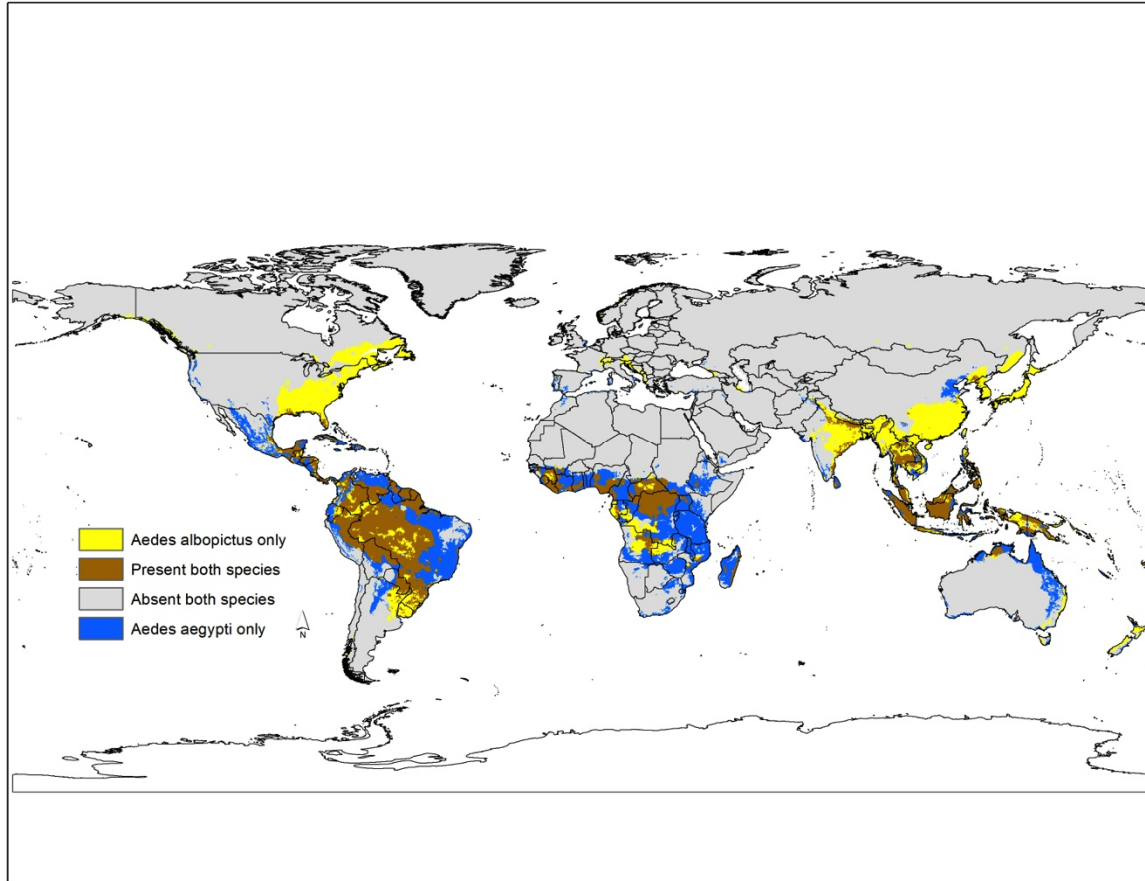

**Figure S16.** Summary of patterns of co-occurrence derived from ecological niche models of *Aedes aegypti* and *A. albopictus* worldwide, both under current conditions and under modeled future conditions (B1 scenario), based on 6 principal components.

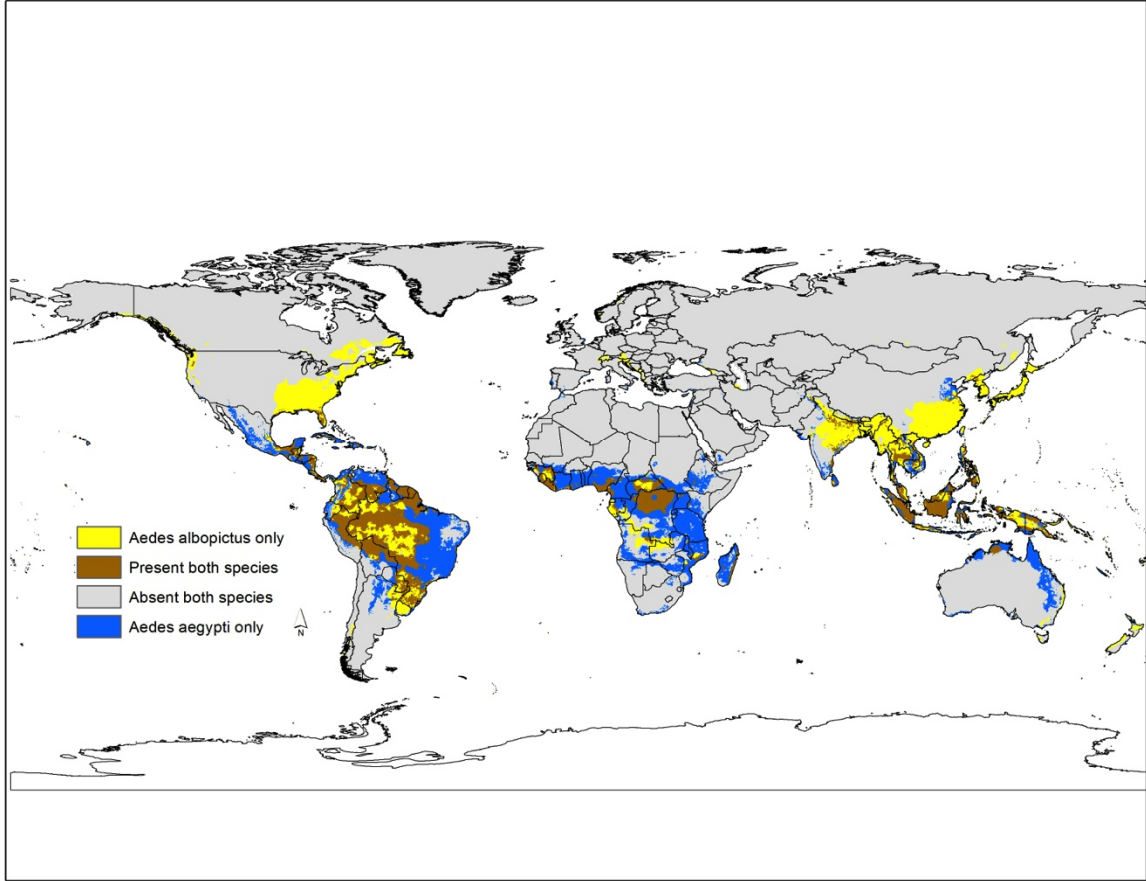



**Figure S17.** Summary of patterns of co-occurrence derived from ecological niche models of *Aedes aegypti* and *A. albopictus* worldwide, both under current conditions and under modeled future conditions (A2 scenario), based on 6 principal components.

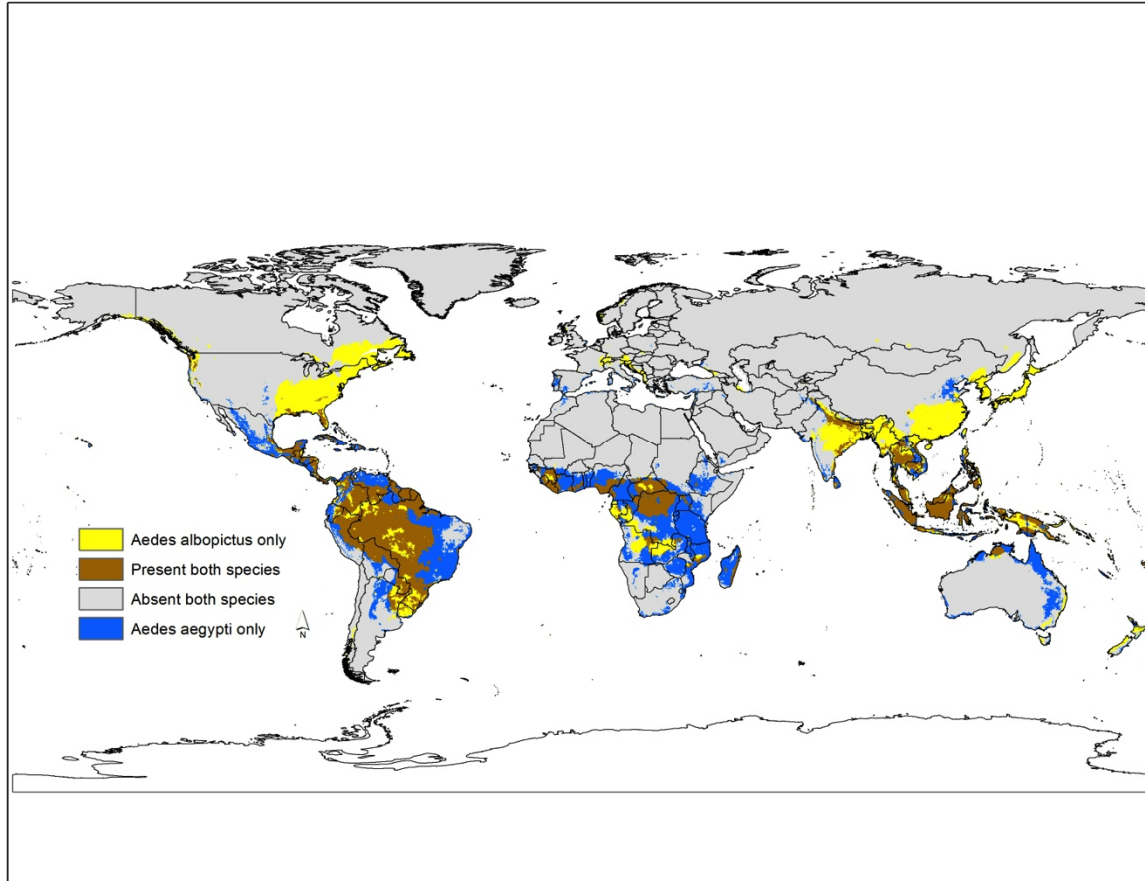

**Figure S18.** Illustration of the bias surface used to guide sampling of the background in the process of calibration of models in Maxent, with darker blue shades indicating more sampling of *Aedes* mosquitoes from those pixels; gray areas have no sampling. The full dataset is available in GeoTIFF format at <http://hdl.handle.net/1808/15275>.

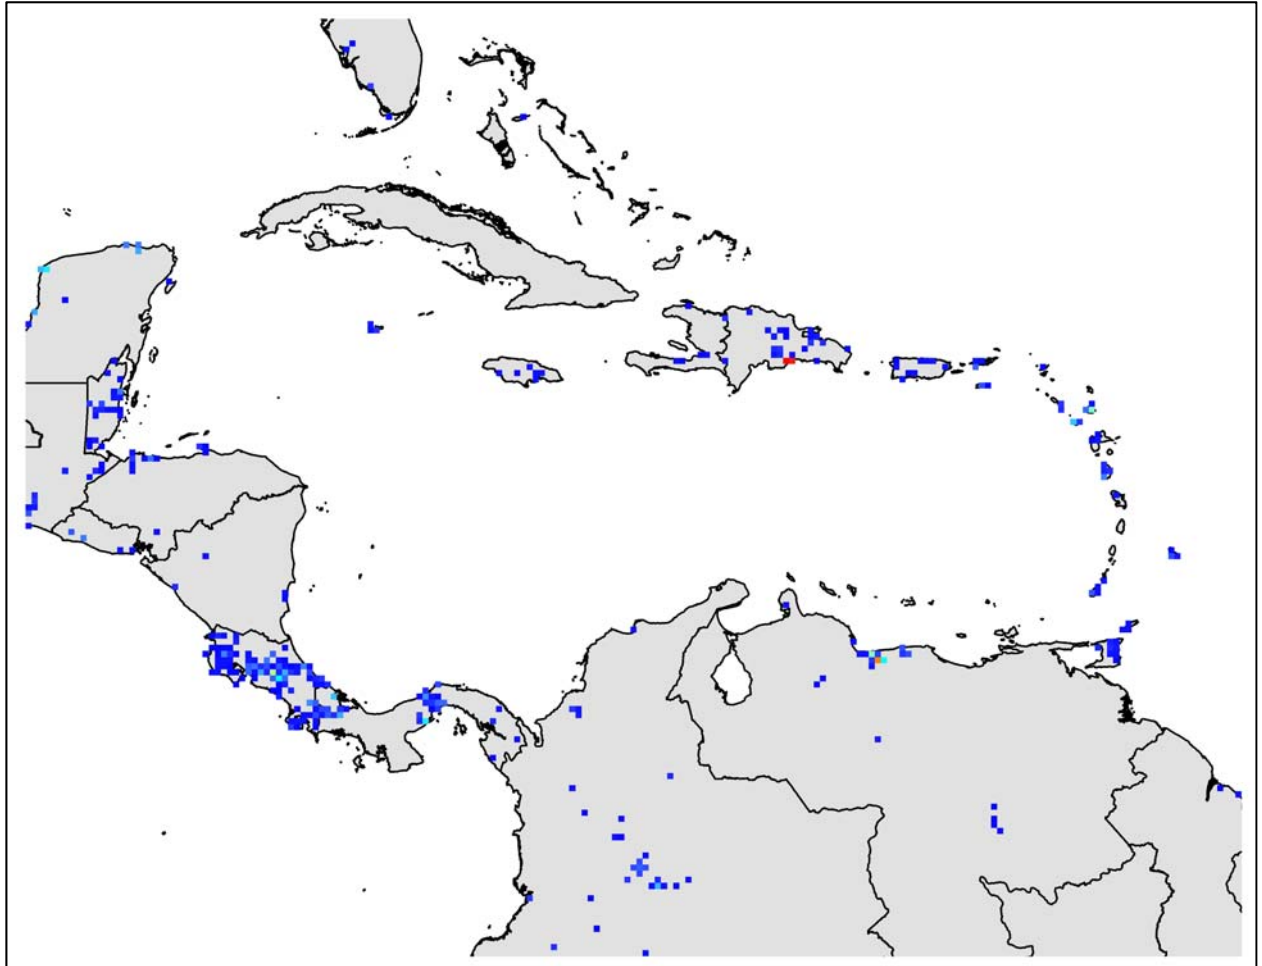

Supplement: rstb20140135supp1.pdf [file rstb20140135supp1.pdf]
